# Supplementary material for: A comparative study on knowledge towards COVID-19 prevention among undergraduate students in Macao and Zhuhai, China
Source: PeerJ journal article supplement (doi:10.7717/peerj.11833), 2021-08-03
Supplement: Questionnaire.pdf [file Questionnaire.pdf]

## Questionnaire of COVID-19 preventive knowledge

---

### Question list

---

**Question 1: The time condition and temperature condition that can inactivate the SARS-CoV-2.**

- Option A. Maintain 56 °C for 30 minutes
- Option B. Maintain 56 °C for 15 minutes
- Option C. Maintain 56 °C for 20 minutes
- Option D. Maintain below 0 °C for 10 minutes

**Question 2: The type of disinfectant that cannot inactivate the SARS-CoV-2.**

- Option A. Peroxyacetic acid
- Option B. 75% ethanol
- Option C. Iodophor
- Option D. Bleach powder

**Question 3: The non-transmission pathways of the SARS-CoV-2.**

- Option A. Contact transmission
- Option B. Droplet transmission
- Option C. Soil transmission
- Option D. Aerosol transmission

**Question 4: The wrong precaution when coughing and sneezing.**

- Option A. Cover your nose and mouth with a tissue or elbow when coughing and sneezing.
- Option B. Cover your nose and mouth with both hands when coughing and sneezing.
- Option C. Put the sneezing tissue in the dustbin with cover.
- Option D. It's best to clean your hands thoroughly after sneezing and coughing.

**Question 5: The wrong precaution for the use of disposable medical masks.**

- Option A. It is recommended to replace the mask every 2-4 hours.
  - Option B. It should be replaced immediately once the mask has contaminated.
  - Option C. When wearing masks, avoid touching the inner side of the mask.
  - Option D. The thicker the mask, the better the anti-virus effect.
-
